# Supplementary material for: A Comparative Analysis of the Flavor, Aroma, and Compositions in Three Levels of Stir-Frying Cyperus rotundus Using E-Tongue, E-Nose, and HS-GC-MS
Source: Hindawi journal article supplement (doi:10.1155/2023/7499169), 2023-07-13
Supplement: f1 [file 7499169.f1.zip]

Archive with 3 entries (3 files):
- Table S1 The flavor values of three levels of sf-CR detected by the E-tongue (mean±SD).docx
- Table S2 The aroma values of three levels of sf-CR detected by the E-nose (mean±SD).docx
- Table S3 The raw data of GC-MS differential compound .txt
