# Supplementary material for: A Comparative Analysis of the Flavor, Aroma, and Compositions in Three Levels of Stir-Frying Cyperus rotundus Using E-Tongue, E-Nose, and HS-GC-MS
Source: Hindawi journal article supplement (doi:10.1155/2023/7499169), 2023-07-13
Supplement: f1 [file 7499169.f1.zip › Table S1 The flavor values of three levels of sf-CR detected by the E-tongue (mean±SD).docx]

| **Table S1 The flavor values of three levels of sf-CR detected by the E-tongue (mean±SD)** | | | | | | | | | | |
| --- | --- | --- | --- | --- | --- | --- | --- | --- | --- | --- |
| Sample | | Sourness | Bitterness | Astringency | Aftertaste-B | A ftertaste-A | Umami | Richness | Saltiness | Sweetness |
| LY1 | -24.17±0.04 | | 13.38±0.07 | 2.66±0.05 | 0.78±0.03 | 0.26±0.02 | 7.60±0.11 | 0.80±0.03 | -18.54±0.05 | 14.09±0.02 |
| LY2 | -24.80±0.09 | | 13.49±0.04 | 2.85±0.02 | 0.76±0.01 | 0.27±0.01 | 7.85±0.02 | 0.86±0.07 | -18.54±0.04 | 14.19±0.03 |
| LY3 | -25.11±0.08 | | 13.49±0.04 | 2.76±0.03 | 0.71±0.01 | 0.26±0.01 | 7.88±0.12 | 0.82±0.01 | -18.43±0.04 | 14.31±0.06 |
| LY4 | -24.03±0.03 | | 13.32±0.06 | 2.82±0.05 | 0.70±0.02 | 0.24±0.01 | 7.52±0.01 | 0.84±0.07 | -18.81±0.21 | 14.12±0.06 |
| LY5 | -24.54±0.07 | | 13.71±0.04 | 2.78±0.05 | 0.96±0.03 | 0.25±0.02 | 7.81±0.02 | 0.86±0.15 | -18.86±0.12 | 13.83±0.07 |
| LY6 | -25.38±0.22 | | 13.79±0.02 | 2.98±0.03 | 0.73±0.02 | 0.26±0.01 | 7.89±0.08 | 0.91±0.06 | -18.90±0.10 | 14.61±0.17 |
| LY7 | -24.93±0.06 | | 13.49±0.02 | 2.71±0.13 | 0.76±0.02 | 0.25±0.01 | 7.82±0.05 | 0.83±0.04 | -18.69±0.20 | 13.89±0.04 |
| LY8 | -24.48±0.13 | | 13.52±0.07 | 2.68±0.03 | 0.79±0.02 | 0.28±0.01 | 8.03±0.09 | 0.93±0.11 | -18.68±0.08 | 14.09±0.15 |
| LY9 | -22.79±0.07 | | 13.73±0.09 | 2.96±0.20 | 0.80±0.01 | 0.30±0.01 | 7.62±0.05 | 0.91±0.11 | -18.73±0.09 | 13.94±0.15 |
| LY10 | -25.80±0.12 | | 13.75±0.06 | 2.96±0.04 | 0.75±0.02 | 0.30±0.01 | 8.08±0.06 | 0.90±0.08 | -18.51±0.02 | 14.57±0.16 |
| Y1 | -22.18±0.02 | | 12.21±0.05 | 1.57±0.03 | 0.64±0.02 | 0.21±0.01 | 6.88±0.04 | 0.71±0.03 | -18.47±0.07 | 11.18±0.09 |
| Y2 | -22.71±0.11 | | 12.59±0.05 | 1.70±0.05 | 0.74±0.05 | 0.23±0.01 | 7.06±0.02 | 0.68±0.04 | -18.53±0.08 | 11.44±0.05 |
| Y3 | -23.44±0.17 | | 12.62±0.02 | 1.99±0.02 | 0.66±0.04 | 0.23±0.02 | 7.12±0.03 | 0.72±0.07 | -18.81±0.09 | 11.59±0.13 |
| Y4 | -22.61±0.11 | | 12.50±0.03 | 2.06±0.03 | 0.64±0.02 | 0.21±0.00 | 6.96±0.02 | 0.69±0.03 | -19.02±0.07 | 11.89±0.08 |
| Y5 | -22.85±0.13 | | 12.18±0.04 | 1.75±0.06 | 0.61±0.01 | 0.22±0.03 | 7.19±0.10 | 0.80±0.04 | -18.91±0.12 | 10.93±0.04 |
| Y6 | -23.08±0.10 | | 12.8±0.01 | 1.83±0.07 | 0.67±0.02 | 0.22±0.03 | 6.97±0.04 | 0.84±0.04 | -18.82±0.10 | 11.69±0.06 |
| Y7 | -22.63±0.01 | | 13.45±0.06 | 1.87±0.09 | 1.01±0.01 | 0.22±0.02 | 7.03±0.01 | 0.73±0.02 | -18.94±010 | 11.77±0.05 |
| Y8 | -23.82±0.11 | | 12.79±0.02 | 1.35±0.17 | 0.85±0.03 | 0.18±0.01 | 7.41±0.11 | 0.74±0.01 | -18.96±0.02 | 10.25±0.12 |
| Y9 | -21.20±0.16 | | 12.67±0.01 | 2.08±0.08 | 0.66±0.03 | 0.26±0.02 | 6.87±0.02 | 0.72±0.03 | -19.10±0.04 | 11.13±0.04 |
| Y10 | -23.61±0.16 | | 12.71±0.02 | 1.91±0.06 | 0.65±0.03 | 0.23±0.02 | 7.26±0.09 | 0.70±0.01 | -18.65±0.05 | 11.63±0.06 |
| B1 | -21.17±0.09 | | 12.60±0.03 | 1.73±0.07 | 0.77±0.02 | 0.28±0.01 | 6.61±0.05 | 0.57±0.02 | -18.61±0.06 | 11.53±0.03 |
| B2 | -21.32±0.09 | | 12.71±0.04 | 1.61±0.11 | 0.75±0.00 | 0.27±0.00 | 6.64±0.01 | 0.55±0.01 | -18.68±0.11 | 11.57±0.10 |
| B3 | -21.48±0.03 | | 12.92±0.06 | 1.64±0.08 | 0.79±0.01 | 0.27±0.00 | 6.67±0.04 | 0.56±0.01 | -18.88±0.13 | 11.85±0.00 |
| B4 | -21.75±0.04 | | 12.96±0.04 | 1.58±0.09 | 0.80±0.01 | 0.24±0.00 | 6.67±0.02 | 0.55±0.02 | -18.82±0.10 | 12.16±0.07 |
| B5 | -21.36±0.04 | | 12.90±0.05 | 1.87±0.08 | 0.77±0.00 | 0.28±0.00 | 6.65±0.00 | 0.57±0.03 | -18.98±0.13 | 11.83±0.01 |
| B6 | -20.72±0.02 | | 12.54±0.02 | 1.61±0.02 | 0.69±0.01 | 0.26±0.01 | 6.45±0.03 | 0.58±0.00 | -19.09±0.02 | 11.35±0.04 |
| B7 | -21.69±0.04 | | 13.03±0.02 | 1.66±0.07 | 0.81±0.00 | 0.28±0.01 | 6.77±0.03 | 0.57±0.00 | -18.92±0.07 | 11.92±0.01 |
| B8 | -20.57±0.01 | | 12.57±0.01 | 1.56±0.04 | 0.72±0.01 | 0.27±0.01 | 6.44±0.02 | 0.57±0.02 | -19.25±0.08 | 11.31±0.01 |
| B9 | -19.59±0.06 | | 12.28±0.03 | 1.69±0.11 | 0.69±0.02 | 0.30±0.01 | 6.19±0.01 | 0.61±0.03 | -19.29±0.09 | 10.84±0.04 |
| B10 | -21.04±0.08 | | 12.79±0.04 | 1.89±0.07 | 0.80±0.01 | 0.33±0.01 | 6.59±0.01 | 0.57±0.01 | -18.86±0.16 | 11.61±0.10 |
