# Supplementary material for: A Comparative Analysis of the Flavor, Aroma, and Compositions in Three Levels of Stir-Frying Cyperus rotundus Using E-Tongue, E-Nose, and HS-GC-MS
Source: Hindawi journal article supplement (doi:10.1155/2023/7499169), 2023-07-13
Supplement: f1 [file 7499169.f1.zip › Table S2 The aroma values of three levels of sf-CR detected by the E-nose (mean±SD).docx]

**Table S2 The aroma values of three levels of sf-CR detected by the E-nose (mean±SD)**

| **sample** | **W1C** | | **W5S** | **W3C** | **W6S** | **W5C** | **W1S** | **W1W** | **W2S** | **W2W** | **W3S** |
| --- | --- | --- | --- | --- | --- | --- | --- | --- | --- | --- | --- |
| LY1 | 0.9386±0.0041 | 5.7909±0.0041 | | 0.9823±0.0025 | 0.9455±0.0019 | 0.9888±0.0012 | 1.4043±0.0071 | 6.9579±0.0031 | 1.1473±0.0013 | 7.8404±0.0054 | 0.9959±0.0010 |
| LY2 | 0.9531±0.0020 | 6.2379±0.0035 | | 0.9873±0.0013 | 0.9669±0.0044 | 0.9869±0.0012 | 1.4651±0.0064 | 6.4357±0.0039 | 1.1756±0.0087 | 7.7174±0.0018 | 0.9952±0.0033 |
| LY3 | 0.9594±0.0053 | 6.3385±0.0018 | | 0.9829±0.0031 | 0.9383±0.0066 | 0.9844±0.0012 | 1.4794±0.0011 | 6.7830±0.0090 | 1.1722±0.0009 | 7.5264±0.0089 | 1.0136±0.0050 |
| LY4 | 0.9589±0.0043 | 5.5196±0.0065 | | 0.9838±0.0022 | 0.9621±0.0039 | 0.9845±0.0017 | 1.4506±0.0052 | 6.7974±0.0091 | 1.1744±0.0090 | 7.9491±0.0083 | 1.0246±0.0047 |
| LY5 | 0.9570±0.0077 | 5.7333±0.0001 | | 0.9842±0.0035 | 0.9589±0.0001 | 0.9851±0.0019 | 1.4688±0.0085 | 6.9744±0.0025 | 1.1763±0.0061 | 8.1782±0.0055 | 1.0228±0.0054 |
| LY6 | 0.9551±0.0015 | 6.0357±0.0017 | | 0.9810±0.0072 | 0.9819±0.0006 | 0.9843±0.0027 | 1.4782±0.0045 | 7.3290±0.0066 | 1.1883±0.0025 | 8.2893±0.0072 | 1.0327±0.0017 |
| LY7 | 0.9444±0.0092 | 6.0023±0.0090 | | 0.9791±0.0053 | 0.9834±0.0074 | 0.9820±0.0044 | 1.5858±0.0004 | 7.6142±0.0026 | 1.2519±0.0066 | 8.2430±0.0012 | 1.0383±0.0063 |
| LY8 | 0.9496±0.0025 | 6.0416±0.0044 | | 0.9836±0.0022 | 0.9872±0.0057 | 0.9845±0.0002 | 1.5839±0.0026 | 7.6137±0.0050 | 1.2315±0.0015 | 8.2675±0.0078 | 1.0171±0.0027 |
| LY9 | 0.9465±0.0086 | 5.9432±0.0057 | | 0.9788±0.0025 | 1.0131±0.0076 | 0.9826±0.0012 | 1.5100±0.0087 | 7.5688±0.0054 | 1.2430±0.0055 | 8.0024±0.0040 | 1.0316±0.0048 |
| LY10 | 0.9425±0.0005 | 5.8028±0.0023 | | 0.9757±0.0073 | 1.0121±0.0054 | 0.9808±0.0018 | 1.5139±0.0095 | 7.4422±0.0085 | 1.2557±0.0065 | 7.5940±0.0056 | 1.0407±0.0015 |
| Y1 | 0.9543±0.0013 | 5.8220±0.0037 | | 0.9842±0.0025 | 1.1178±0.0053 | 0.9867±0.0041 | 1.6597±0.0066 | 8.9120±0.0088 | 1.2013±0.0011 | 8.6462±0.0028 | 1.0012±0.0011 |
| Y2 | 0.9542±0.0063 | 5.9877±0.0057 | | 0.9879±0.0021 | 1.1061±0.0090 | 0.9879±0.0053 | 1.7207±0.0066 | 9.0045±0.0086 | 1.2167±0.0061 | 9.0939±0.0057 | 0.9885±0.0017 |
| Y3 | 0.9576±0.0013 | 4.9187±0.0037 | | 0.9900±0.0025 | 1.0744±0.0053 | 0.9893±0.0090 | 1.6811±0.0014 | 9.3800±0.0088 | 1.1963±0.0011 | 8.1362±0.0028 | 0.9910±0.0011 |
| Y4 | 0.9591±0.0015 | 5.8204±0.0009 | | 0.9860±0.0017 | 1.1436±0.0031 | 0.9890±0.0053 | 1.6368±0.0066 | 9.0832±0.0065 | 1.1757±0.0003 | 8.2837±0.0054 | 1.0080±0.0024 |
| Y5 | 0.9519±0.0033 | 5.4566±0.0085 | | 0.9812±0.0015 | 1.1456±0.0060 | 0.9849±0.0031 | 1.6586±0.0087 | 9.2817±0.0009 | 1.2070±0.0025 | 8.2689±0.0002 | 1.0241±0.0036 |
| Y6 | 0.9519±0.0093 | 5.4566±0.0028 | | 0.9812±0.0069 | 1.1456±0.0079 | 0.9849±0.0060 | 1.6586±0.0072 | 9.2817±0.0027 | 1.2070±0.0067 | 8.2689±0.0016 | 1.0241±0.0027 |
| Y7 | 0.9632±0.0001 | 5.6462±0.0075 | | 0.9855±0.0049 | 1.2068±0.0058 | 0.9867±0.0079 | 1.6565±0.0038 | 9.8667±0.0047 | 1.1792±0.0042 | 8.6507±0.0063 | 1.0056±0.0018 |
| Y8 | 0.9610±0.0023 | 5.8416±0.0021 | | 0.9844±0.0021 | 1.1694±0.0049 | 0.9868±0.0058 | 1.7006±0.0027 | 9.4796±0.0065 | 1.1929±0.0027 | 9.0871±0.0020 | 1.0101±0.0036 |
| Y9 | 0.9518±0.0024 | 5.0308±0.0044 | | 0.9826±0.0026 | 1.1711±0.0073 | 0.9853±0.0049 | 1.7632±0.0006 | 8.9283±0.0069 | 1.2347±0.0016 | 8.3307±0.0054 | 1.0170±0.0099 |
| Y10 | 0.9634±0.0008 | 4.7049±0.0030 | | 0.9851±0.0040 | 1.1318±0.0027 | 0.9877±0.0073 | 1.6898±0.0059 | 8.8037±0.0071 | 1.1651±0.0023 | 8.0923±0.0075 | 1.0149±0.0054 |
| B1 | 0.9543±0.0032 | 5.8963±0.0098 | | 0.9868±0.0022 | 1.1448±0.0070 | 0.9908±0.0027 | 1.9497±0.0079 | 9.7627±0.0051 | 1.3632±0.0055 | 8.5889±0.0039 | 0.9880±0.0065 |
| B2 | 0.9507±0.0054 | 6.1080±0.0077 | | 0.9863±0.0017 | 1.1947±0.0041 | 0.9876±0.0070 | 2.0355±0.0007 | 9.1862±0.0087 | 1.3214±0.0061 | 8.9354±0.0052 | 0.9852±0.0018 |
| B3 | 0.9502±0.0049 | 5.3667±0.0039 | | 0.9855±0.0036 | 1.1529±0.0004 | 0.9875±0.0041 | 1.9800±0.0068 | 8.5105±0.0091 | 1.3098±0.0007 | 8.3723±0.0047 | 0.9800±0.0008 |
| B4 | 0.9436±0.0032 | 5.7575±0.0070 | | 0.9804±0.0042 | 1.1433±0.0054 | 0.9845±0.0004 | 1.9318±0.0044 | 8.9533±0.0048 | 1.3926±0.0076 | 8.9502±0.0011 | 1.0043±0.0024 |
| B5 | 0.9563±0.0057 | 6.0248±0.0009 | | 0.9850±0.0026 | 1.1908±0.0011 | 0.9869±0.0011 | 1.9751±0.0005 | 8.2567±0.0033 | 1.3586±0.0029 | 8.9071±0.0086 | 0.9974±0.0023 |
| B6 | 0.9469±0.0058 | 5.8230±0.0097 | | 0.9825±0.0026 | 1.1687±0.0091 | 0.9855±0.0091 | 1.9656±0.0064 | 8.1247±0.0067 | 1.3103±0.0015 | 8.6462±0.0061 | 1.0058±0.0047 |
| B7 | 0.9543±0.0006 | 6.1045±0.0029 | | 0.9703±0.0057 | 1.1865±0.0089 | 0.9871±0.0089 | 1.9502±0.0010 | 8.3160±0.0084 | 1.3859±0.0066 | 9.0040±0.0045 | 1.0028±0.0052 |
| B8 | 0.9667±0.0030 | 6.3797±0.0020 | | 0.9882±0.0015 | 1.2079±0.0060 | 0.9877±0.0060 | 1.9419±0.0041 | 9.2288±0.0012 | 1.3895±0.0086 | 8.6190±0.0015 | 0.9942±0.0021 |
| B9 | 0.9632±0.0046 | 5.1679±0.0004 | | 0.9870±0.0020 | 1.1673±0.0099 | 0.9871±0.0099 | 1.9139±0.0016 | 8.2744±0.0027 | 1.3882±0.0033 | 9.0877±0.0029 | 1.0010±0.0014 |
| B10 | 0.9683±0.0055 | 5.9594±0.0069 | | 0.9878±0.0015 | 1.1720±0.0081 | 0.9889±0.0081 | 1.9492±0.0067 | 8.8456±0.0053 | 1.3569±0.0019 | 8.3059±39 | 0.9998±0.0006 |
