# Supplementary material for: A Comparative Analysis of the Flavor, Aroma, and Compositions in Three Levels of Stir-Frying Cyperus rotundus Using E-Tongue, E-Nose, and HS-GC-MS
Source: Hindawi journal article supplement (doi:10.1155/2023/7499169), 2023-07-13
Supplement: f1 [file 7499169.f1.zip › Table S3 The raw data of GC-MS differential compound .txt]

Peak	Rt(min)	RI	Metabolite name	LY1	LY10	LY2	LY3	LY4	LY5	LY6	LY7	LY8	LY9	Y1	Y10	Y2	Y3	Y4	Y5	Y6	Y7	Y8	Y9	B1	B10	B2	B3	B4	B5	B6	B7	B8	B9
1	3.926	462.86	2-methyl pyrazine	334394.7	311925.9	326619.5	355953.2	288297.2	329026.3	333029.3	347240.2	315927.4	377971.7	686469.8	768022.2	771769.1	756156.1	782378	796657.5	802320.3	739465.4	965856.1	990483.7	958904.1	1051631	973401.6	1203022	1080474.4	1006620	978241.4	1098714	1097735	1050941
2	4.051	473.09	1,4-dimethylpyrazole	1345710	1444439	1398074	1434054	1427004	1446721	1385535	1317075	1288140	1343175	4183263	4629442	4925500	4717909	4794247	4845222	4780528	4729833	4644750	4457370	21442430	21219400	20876370	20511780	19283460	20581430	22497440	19127450	21896620	21504640
3	6.308	569.13	2,5-dimethyl pyrazine	233919.7	300663.1	309416.4	368105.3	279201.5	243858.9	259854.1	352716.8	277552.6	362580.5	688893.7	784687.8	784354.9	775987.8	799361.6	786265.1	801194.9	773707.3	742566	811046	990427.3	972257.4	947339.9	1183163	944603.6	1044679	958225.4	1118671	1149601	1142208
4	7.082	607.29	2-methoxy pyrazine	164939.6	161664.8	178618.6	166238.3	150074.1	143521.9	134699.1	153194.7	131486	138854.9	538458.8	497239.1	534464.6	519348.5	589400.8	586510.3	583658.3	560804.9	559401.3	595051.1	2663466	2942039	2880919	2633337	2731980	2847317	2972680	2663407	3044421	3107650
5	8.109	833.48	¦Á-Pinene	3683411	3999107	3728929	4383488	4026271	3855781	3741147	3715293	4160669	4050647	2591591	2594694	2622916	2404726	2592318	2529222	2306251	2317596	2577415	2409112	2073867	1676380	1479208	1402135	1699332	1735993	2053770	2090463	1790673	1930623
6	8.885	974.58	¦Â-Pinene	6179582	5785169	5179385	6491130	5869584	5829785	6011740	5998568	5563977	5379494	3200388	3632923	3488170	3491283	3110563	3614050	3946615	3392548	3291381	3386991	2297128	2298742	2316069	2382738	2564622	2784607	2582186	2322299	2331801	2315162
7	11.008	1024.72	p-Cymene	1069604.7	1072190.7	1005028	1252727	942514.4	963237.4	962799.3	950908.8	1021246.3	1052398.9	754248.7	767521	808577.6	820838.4	802410.7	791741.2	743640	745793.9	661415.4	721695.5	546764.5	563967.8	463912.7	460682.6	570321.1	642684.9	577761.3	560524.3	542907.9	614367.6
8	11.207	1034.52	D-Limonene	615814	582665.2	567683	647103.7	543358.6	533779.1	568035.2	521666.8	579938.1	534680.7	330627.7	319964.3	279215.8	272763.6	320848.5	304784.3	335016.9	305753.4	298340.6	314737.4	193809.7	195713.9	172887.3	157479.4	169160.2	179221.5	183544	172369.2	172916.5	188376.6
9	14.971	1127.94	Camphene	2027391	2060605	2121922	2282125	2231111	2404623	2368889	2250464	2171801	2085692	1651890	1519193	1529154	1512621	1559068	1595739	1797829	1736995	1679910	1685583	992250	1176822	1100392	996833.3	1022561	1115921	1034902	1186439	1148638	1095509
10	15.729	1151.98	trans-Verbenol	2880696	2688631	2810751	2968064	2972175	3000989	3181991	2965089	2845665	2906482	1589123	1523639	1610237	1727033	1602565	1612299	1718023	1618834	1523999	1658669	518063	571517.9	580567.3	549883.9	566833.4	593707.9	637911.6	593341.8	612835.9	573553.6
11	18.679	1159.06	Pinocarvone	1627716.7	1453510	1538917	1409302	1405122	1524443	1584768	1477831	1364906	1514955	518322.1	550322	568209.7	514363.9	562729	617037.2	568093.3	580809.1	547334.8	646107.2	368285.6	303455.5	302453.8	375292.2	323630	326238.9	315688.4	336221.8	380735.9	377085.8
12	19.653	1173.88	(-)-myrtenal	2988062	2841377	2677541	2886568	2538178	2807602	3262424	3016656	2888809	2691778	1994983	2136847	2146565	1968103	2251818	2172168	2153995	2011061	2261631	2186967	1131037	1290190	1000578	1045970	1455180	1144209	1038067	1134626	1104063	1026222
13	19.749	1166.6	¦Â-Vatirenene	2238802	2345669	2247951	2420967	1843321	2227747	2039028	1984533	1843275	2055452	1306819	1540960	1290750	1262514.8	1126246	1390188.2	1168428	1223754	1416497	1260089	800867.1	725423.7	827624	776562.8	750808.3	787861	845916	766390.5	852121.4	870181
14	20.157	1179.07	Ylangene	958460.4	954308.6	974350.3	1022392	899212.6	942539.9	846551.8	884109.7	854264.9	874345.1	329013.4	361866.9	364663.2	307163	413517.1	358026.2	472216.9	395256.8	441731.4	399441.4	298952.3	256404.7	232479.4	190410.6	243085	258871.4	231387.4	292433.7	259047.9	256184.3
15	20.175	1187.57	¦Â-Elemene	10065715	13367667	13126300	15686240	13392425	15513816	13668930	11519830	10640060	12411253	5781259	6327200	5787389	4366203	5723631	4684121	6621102	6007186	5087266	5478180	3288448	4147000	4052884	3761136	4779933	4134833	3560663	4276633	3865947	4067833
16	20.557	1189.23	¦Á-Guaiene	1159455.1	1086411	1043524	1228595	1056493	1254860.5	1276140	1435206	1285638	1055411	659292.4	707113	773584.7	620845.5	776207	693722.9	695088.8	744076	772786.1	740376	499986	430234.6	509945.2	445034.6	397144	464216	505486.4	435161.2	462390.5	519336.8
17	21.163	1209.01	Santalene	909896.2	1015381.4	1015587	1050963	923880.6	905933.4	1055646	1008559	1059549	976313.5	585592.5	646587	615105.6	498803.3	604998.1	543554.5	678078.8	658555.6	596306.8	564441	402904.3	478868.9	432501.8	391210.7	492142.8	480618.4	408608.1	484984	449743.7	390121.6
18	22.463	1289.41	3,5,11-Eudesmatriene	31234510	29171260	32152570	32919490	31540940	29093550	32228940	31146170	31319770	30726640	23674530	22785810	23135130	24070830	21415880	25660500	21453730	22616280	22976280	25930070	19973240	18033660	20761570	17165850	19798380	19930020	20966430	20350420	19673550	17265590
19	22.522	1293.2	¦Â-Humulene	556109.8	579902.7	633266.9	659526.6	586028.4	512985.4	547180.4	584776.1	546842.6	544882.1	412463.4	409797.8	415977.8	354432.6	447304.4	404198.5	386788.8	416562.4	420102.3	336067.8	297543	272784.7	270664.2	262187.6	262973.6	263754.1	239433.6	269586.5	214252.1	234052.7
20	22.695	1203.38	(+)-Sativene	204441.4	195059.2	200396.6	177418.8	155128	177172.16	193094.4	167736.6	203529.9	198800.6	302085	314096.5	350314.3	373304.1	340592.5	357425.2	331777.7	371697.8	320771.1	341795.5	638503.6	586570.4	539636.7	585709.9	549522	522776.6	662754.9	650520.2	556129.3	640795.9
21	22.903	1316.32	¦Á-Cubebene	3452597	3924046	4301816	3929710	4643486	3813693	3371529	3301286	4108216	4012997	2192373	1940741	2321082	1913868	2484881	2698021	1958414	2119712	2600762	2733355	1622849	1502832	1556465	1495447	1470300	1515872	1438812	1704283	1326191	1558540
22	23.098	1327.66	¦Â-gurjunene	1233845.3	1364130	1334529	1393907	1276867.1	1032096.7	1061541	1281748	1229891	1265163.4	867909.3	927715.9	954649	811872.1	905180.3	902145.8	835705.2	815345.1	861233.1	900872.4	532436	464878.1	527376.6	550336.8	428190.8	582109.1	539552.4	516260.8	549597.4	499855.7
23	23.108	1333.62	Copaene	548685.8	536081.2	507098.4	536387.9	554461.4	470167.3	524688.4	483960.9	512361.6	508945.3	325894.7	305140.4	367316.7	308897.3	333172.3	299846.6	335130.6	303108.9	338780.8	340065	227903.7	218049.8	180149	254001.5	190088.1	172964.3	200032.5	218320.6	199085.7	187288.5
24	23.603	1339.83	Cyperene epoxide	1376946	1622563	1441590	1496509	1264815	1372171	1472265	1229644	1394437	1478001	693269.8	780463.5	718145.6	765918.3	754998	740837.2	841103.9	821178.1	779704.7	728518.2	225152	217999	177856.6	245867.5	257699.2	201019.2	201488.9	207617	249250.5	249208
25	23.689	1345.4	¦Á-Calacorene	804598.9	869742	825975.7	832329	712546.1	780360.5	766623	738877.1	821084.4	809626.4	1394004	1539576	1411915.9	1526600.9	1690733	1387448	1455304.2	1540026.8	1505628.9	1556661.9	1777091.3	1861867.1	1602817	1856492	1795227.4	1859284.8	1845534	1860353.2	1783264.7	2035335
26	24.403	1369.5	(-)-Spathulenol	265332.5	283497.6	247902.4	240118.9	269494.4	232740	206968.3	250160.3	202790.3	256185	504580.1	461888.2	474216.6	588537.4	595619.5	507880.6	494516.2	515105.3	463950.3	528497.1	988219.8	900376.8	902338.9	1243963	1008582.8	1020740.9	1140494.2	1020377.9	1146665.4	1088795.5
27	24.477	1378.71	Ledene oxide-(II)	2112810	1821196	2077164	2058174	2357131	2293144	2165664	1938041	2156689	2427484	1574083	1500591	1693268	1525430	1542517	1490983	1538150	1531660	1505694	1532752	1068384	1119342	1069311	941729.3	1095488	1019705	1175806	1035217	1032894	1094571
28	24.671	1390.54	Caryophyllene oxide	505298.6	493081.9	449158.6	505227	472127.8	499190.4	506279.4	491313	427110.8	447456.5	770782.9	843881.1	843091	796918.9	769078	798331.9	780582.4	823471.2	821989.3	770477.3	1637006	1703033	1718154	1863895	1605157	1662936	1756268	1532631	1798857	1727398
29	25.301	1412.24	caryophyllene (z-)	511302.4	521790.9	439703.6	452782.8	497326.5	500545	485580.7	484242.2	520481	500077.1	290567.2	295085.5	340700.7	335671.4	338915.9	334790	304677.4	304053.8	300537.9	323618	84186.7	77033.21	66267.5	54116.59	71611.3	47862.09	67080.2	66302.2	63082.2	58218.9
30	25.489	1421.28	Isospathulenol	424281.4	412315.8	420626.9	412657.3	434175.3	443051.8	442295.6	406781.1	429184.5	503560	291939.6	322648.2	324244.8	332066	347167.5	349240.4	316820.3	317979.1	352934.8	380280.6	126705	161703.4	146327.7	130687.4	149525.3	144927.6	134765.6	142280.5	145521.2	134994.1
31	25.567	1433.09	Alloaromadendrene oxide-(2)	3538146	4033628	3832680	4129177	3539497	4584975	4472564	3648999	4265824	4145003	2862823	3081770	3016534	3235603	2935045	3139676	3029215	2952557	3302512	3280808	1322930	1487474	1299163	1412714	1190180	1419249	1609321	1285073	1416493	1499745
32	27.043	15044.99	Cyperotundone	1753080	1628586	1848471	1613443	1747740	1697573	1809322	1793402	1767162	1834048	1246606	1217574	1478620	1452346	1279070.3	1231923	1285712	1197442	1287469	1321446	694498.6	741556.6	723121.8	720305.4	681616.8	708061.4	678235.3	739786.1	721949	688134.1
33	32.823	1747	¦Á-Cyperone	1048555	1094571	1005883	952745.9	1051400	1075014	1146642	971389.1	998021.63	1156913	645518.9	660868.1	632356.2	709663.6	644478.5	684119.5	580723.9	572259.7	637942.4	641601.9	325659.3	376880.8	366575.8	357103.2	317005.6	313709.3	311912.9	356279.8	322929.8	336674.6
